# Supplementary material
Source: PubMed Central journal article supplement (PMC6085867)
Supplement: NIHMS983059-supplement-combined_supplemental_files.pdf [file NIHMS983059-supplement-combined_supplemental_files.pdf]

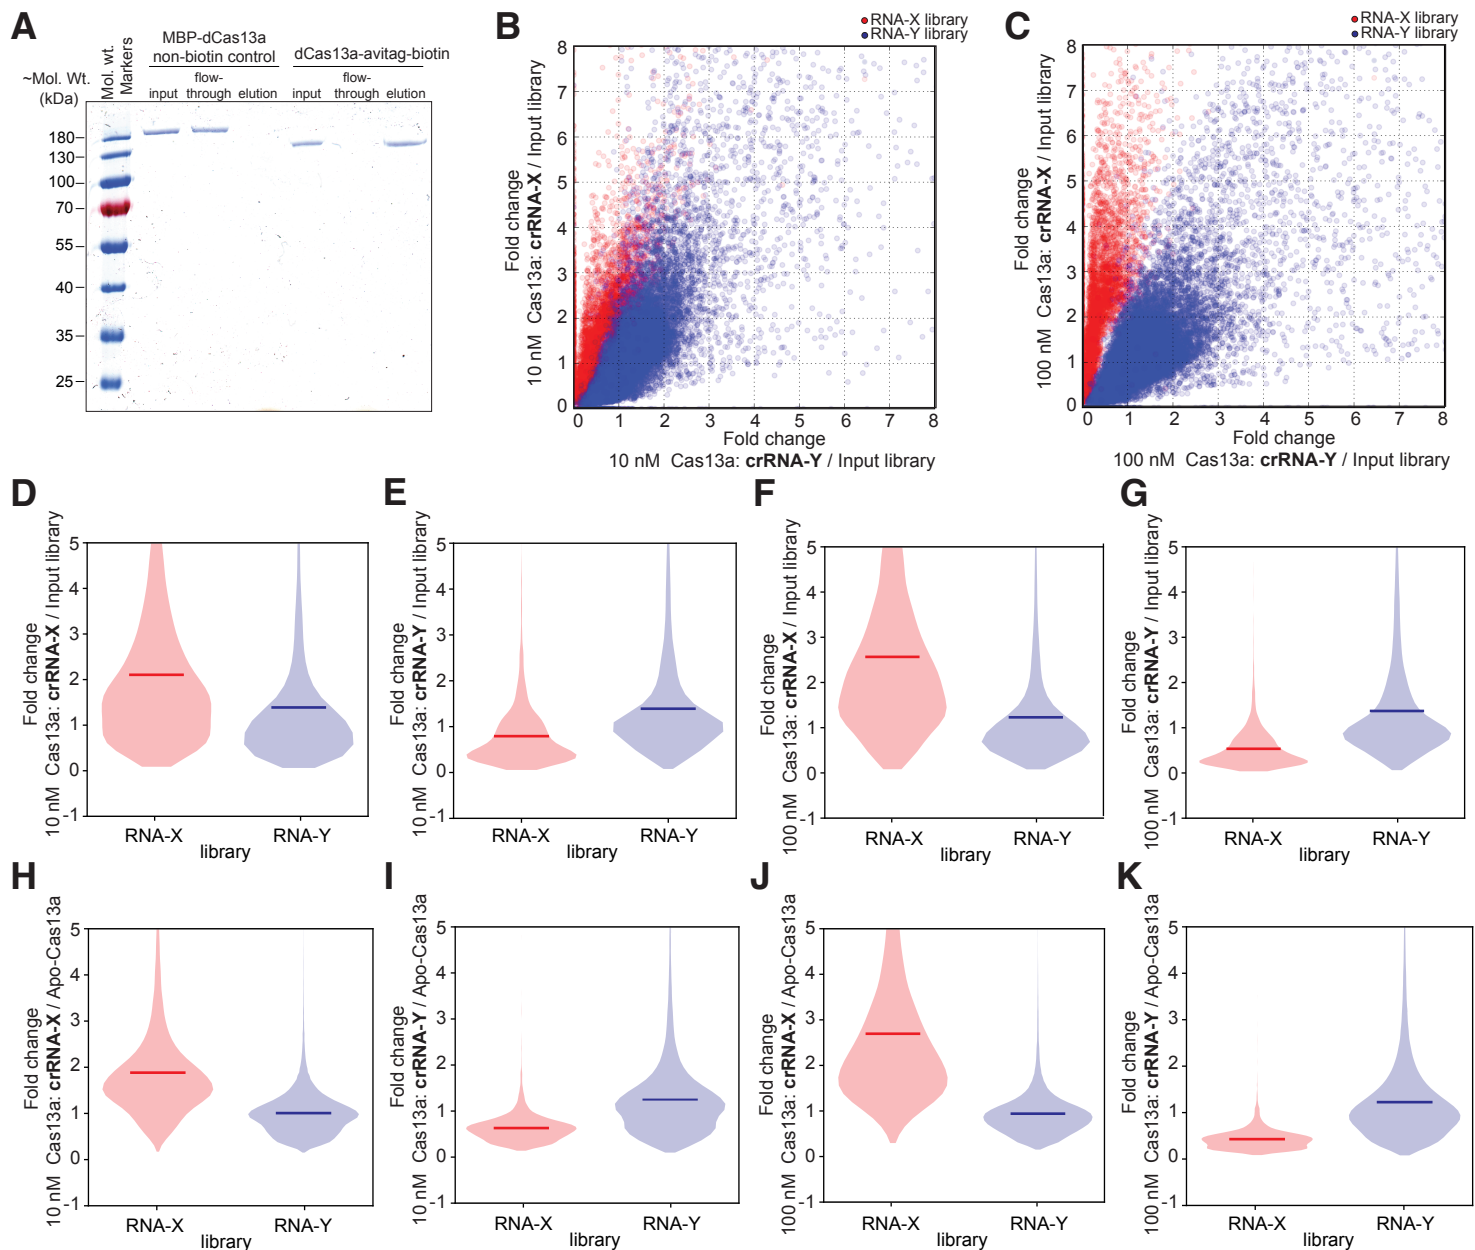

**Figure S1: Related to Figure 1. Controls for the development of high-throughput RNA mismatch profiling to determine activator-RNA binding preferences for Lbu-Cas13a.** (A) Streptavidin pull-down experiment to confirm Lbu-dCas13a-avitag biotinylation. Streptavidin bead binding assay with biotinylated Lbu-dCas13a-avitag or non-biotinylated MBP-Lbu-Cas13a and streptavidin magnetic beads. 8.5 pmol of biotinylated Lbu-dCas13a-avitag or non-biotinylated MBP-Lbu-Cas13a were separately mixed with 12  $\mu$ L streptavidin magnetic beads and incubated in modified processing buffer at 37C for 1 h, followed by three washes with modified processing buffer and elution in boiling SDS-PAGE loading buffer. Input, incubation flow-through & elution for each sample were analyzed using SDS-PAGE. Biotinylated Lbu-dCas13a-avitag only remains specifically bound to the beads. (B,C) Scatter plots displaying fold-change in abundance of each RNA-X and -Y library members between samples with (B) 10 nM crRNA-bound Cas13a (vs. input library) or (C) 100 nM crRNA-bound Cas13a (vs. input library) programmed to target RNA-X or -Y ssRNAs. (D-G) Violin plots displaying fold-change in abundance distributions relative to input library for RNA-X and -Y libraries between samples containing (D) 10 nM Cas13a-crRNA-X, (E) 10 nM Cas13a-crRNA-Y, (F) 100 nM Cas13a-crRNA-X and (G) 100 nM Cas13a-crRNA-Y. (H-K) Violin plots displaying fold-change in abundance distributions compared to apo-Cas13a for RNA-X and -Y libraries between samples containing (H) 10 nM Cas13a-crRNA-X, (I) 10 nM Cas13a-crRNA-Y, (J) 100 nM Cas13a-crRNA-X and (K) 100 nM Cas13a-crRNA-Y. The solid line in each plot indicates the sample mean fold-change. Significant crRNA-dependent enrichment ( $p$ -value  $< 0.001$ ) of the crRNA-complementary library was observed in all cases using a Welch's 2-tailed t-test.

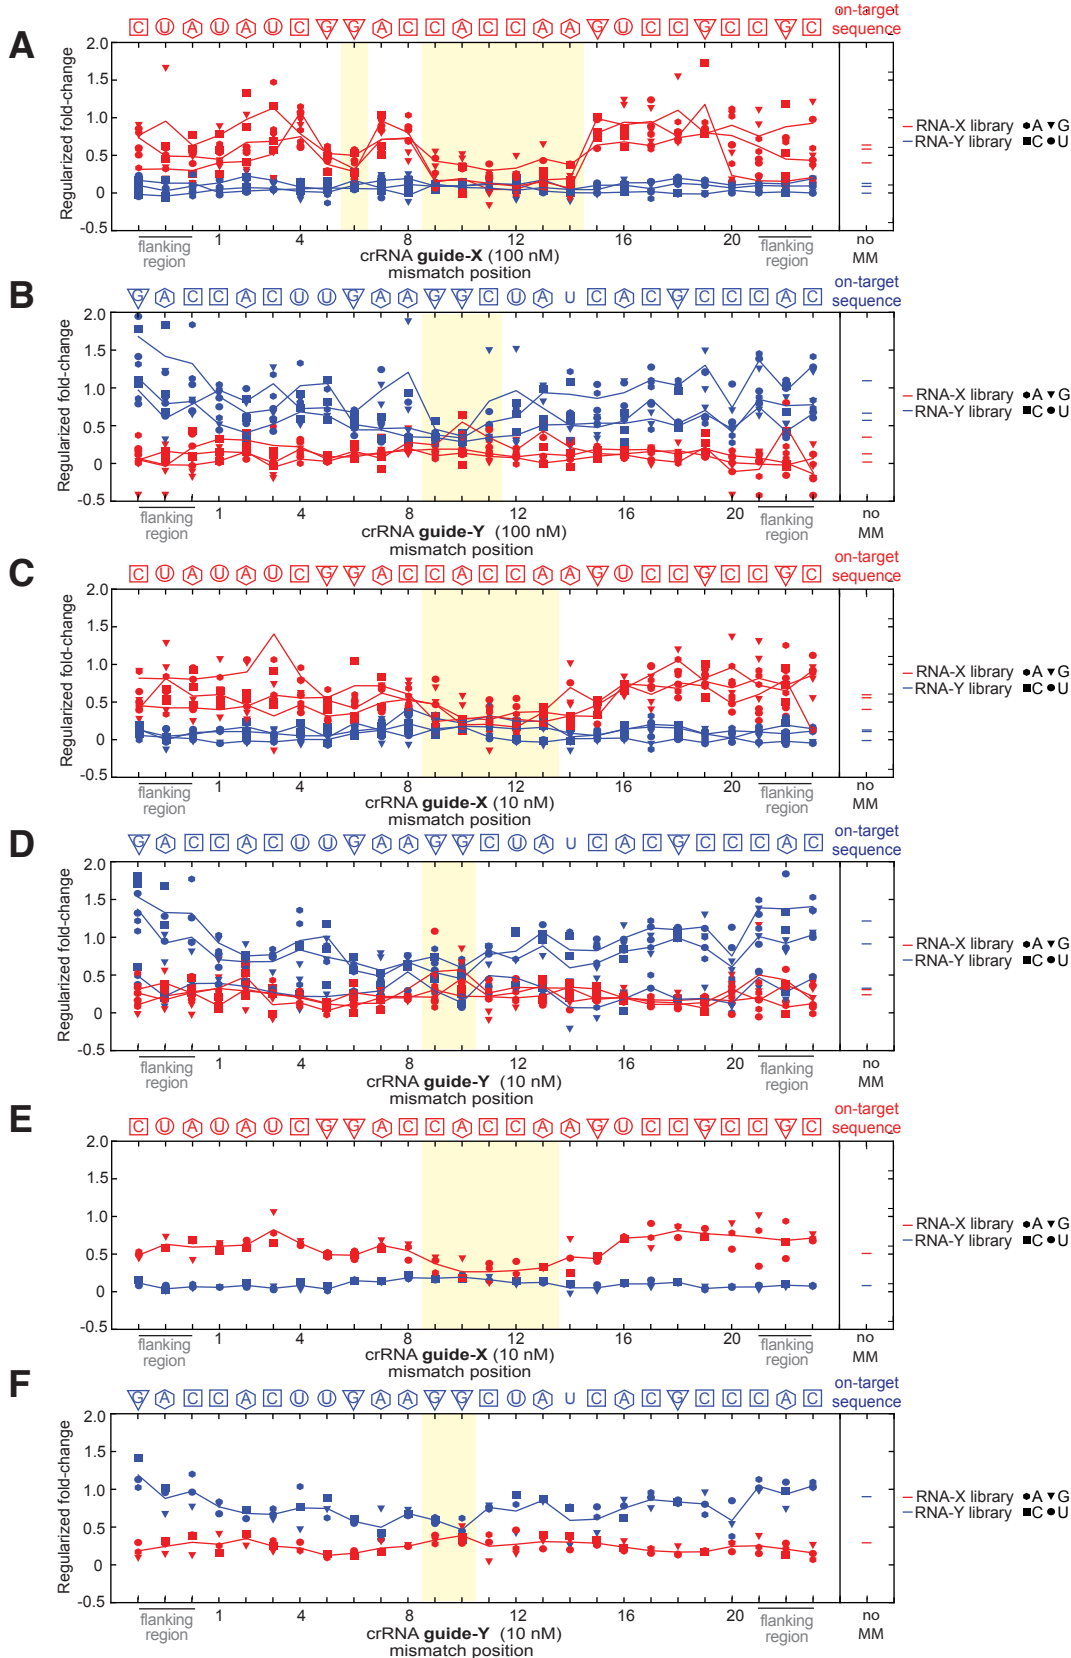

**Figure S2: Related to Figure 2. Additional dCas13a high-throughput RNA mismatch profiling data.** Regularized fold-change enrichment analysis (relative to Apo-dCas13a) for activator-RNA members of both libraries that contain only a single mismatch across the shown spacer-targeting and flanking regions. Plotting all individual points for (A) targeting X activator-RNA library with 100 nM dCas13a: crRNA-X, (B) targeting Y activator-RNA library with 100 nM dCas13a: crRNA-Y, (C) targeting X activator-RNA library with 10 nM dCas13a: crRNA-X, and (D) targeting Y activator-RNA library with 10 nM dCas13a: crRNA-Y. In each plot, each individual point in a position represents the fold-change value for each unique mismatch combination possible in that position (represented from n=3 experiments), The solid line represents as an average fold-enrichment (of all mismatches combinations) in that position for each experiment. Plotting average points for (E) targeting X activator-RNA library with 10 nM dCas13a: crRNA-X, and (F) targeting Y activator-RNA library with 10 nM dCas13a: crRNA-Y. In each plot, each individual point in a position represents the average regularized fold-change value for each unique mismatch combination possible in that position (from n=3). The solid line represents as an average fold-enrichment (of all mismatches combinations) in that position. The fold-change enrichment of the perfectly complementary (noMM) targets in each experiment are show on the right of each plot. The crRNAcomplementary on-target library sequence is shown above each plot. Positions shaded in yellow indicate where statistically significant ( $p < 0.05$ ) lack of enrichment between guide-complementary and guide-non-complementary sequences was observed. See Methods for regularization and permutation test procedure.

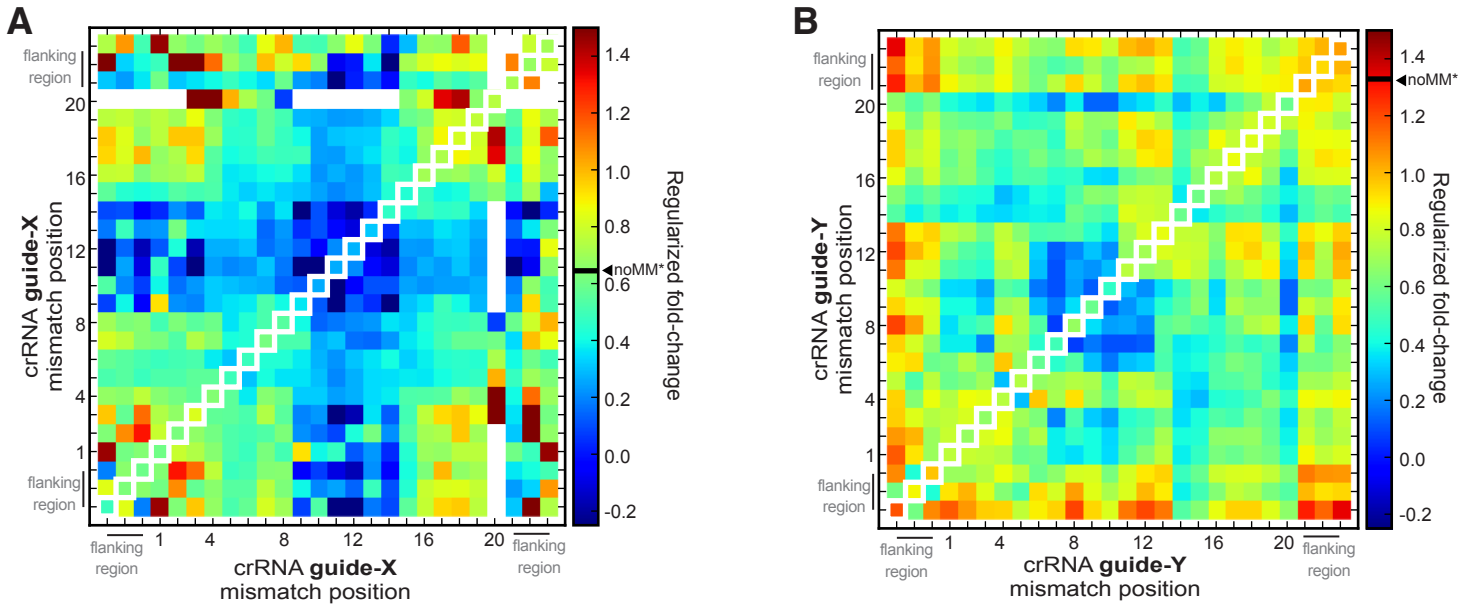

**Figure S3: Related to Figure 2. Additional data demonstrating that dCas13a high-throughput RNA mismatch profiling confirms binding mismatch sensitivity hotspots for double-mismatched activator-RNAs.** Regularized fold-change enrichment analysis (relative to Apo-dCas13a) for activator-RNA members of both libraries for all pairs of mismatches across the shown spacer-targeting and flanking regions when (A) targeting X activator-RNA library with 10 nM dCas13a: crRNA-X, and (B) targeting Y activator-RNA library with 10 nM dCas13a: crRNA-Y. For comparison, single mismatch data is plotted along the diagonal axis and the fold-change value for a perfectly complementary target is indicated on the heat-map scale bar (noMM\*).

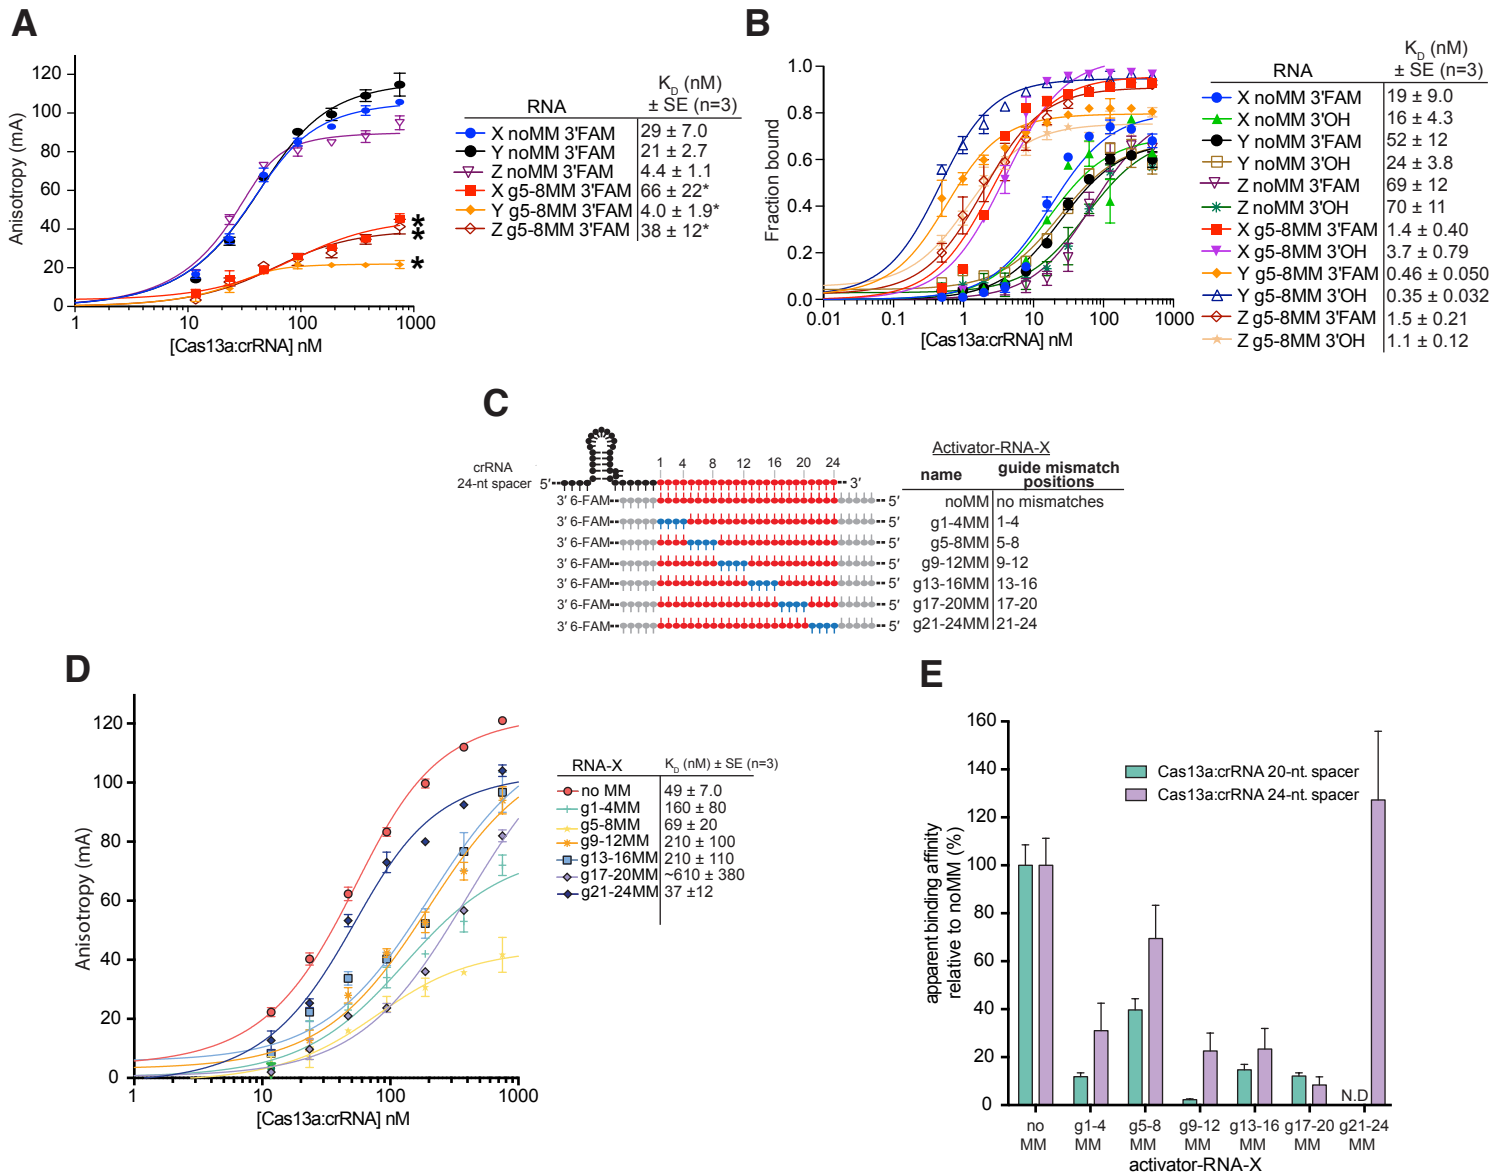

**Figure S4: Related to Figure 3 & 4. Additional activator-RNA binding affinity experiments to validate g5-8MM behavior and additional binding affinity experiments using a 24-nt. crRNA-spacer.** (A) Fluorescence anisotropy binding curves for the interaction between Lbu-dCas13a: crRNA (sequences X, Y or Z) and activator-RNAs (sequences X, Y or Z) with noMM or g5-8MM mismatches. 3'FAM: 3'-end is modified with a 6-FAM fluorophore. Binding data fits (see Methods) shown as solid lines. Error-bars represent the s.d of the fraction bound from three independent experiments. Dissociation constants ( $K_D$ ) and their associated standard errors (SE) from three independent experiments are shown. An asterisk (\*) indicates measurements for g5-8MM targets that are very likely inaccurate due to very low change in fluorescent anisotropy between unbound and bound activator RNA species. (B) Filter binding curves for the interaction between Lbu-dCas13a: crRNA (sequences X, Y or Z) and activator-RNAs (sequences X, Y or Z) with noMM or g5-8MM mismatches. Activator-RNAs are all labeled with a 5'-32P, and either possess an unmodified 3'-hydroxyl end (3'-OH) or a 3' end modified with 6-FAM fluorophore (3'FAM), and were detected using phosphor-imaging. Binding data fits (see Methods) shown as solid lines. Error-bars represent the s.d of the fraction bound from three independent experiments. Dissociation constants ( $K_D$ ) and their associated standard errors (SE) from three independent experiments are shown. (C) Schematic of the Lbu-Cas13a crRNA-24-nt-spacer: activator-RNA interaction highlighting the different activator-RNAs tested in this study. (D) Fluorescence anisotropy binding curves for the interaction between Lbu-dCas13a: crRNA-X (with a 24-nt. spacer) and X activator-RNAs depicted in (C). Binding data fits (see Methods) shown as solid lines. Error-bars represent the s.d of the anisotropy from three independent experiments. Dissociation constants ( $K_D$ ) and their associated standard errors (SE) from three independent experiments are shown. (E) Data from (D) normalized as a percentage binding affinity relative to the affinity to a perfectly complementary activator-RNA X (no MM).

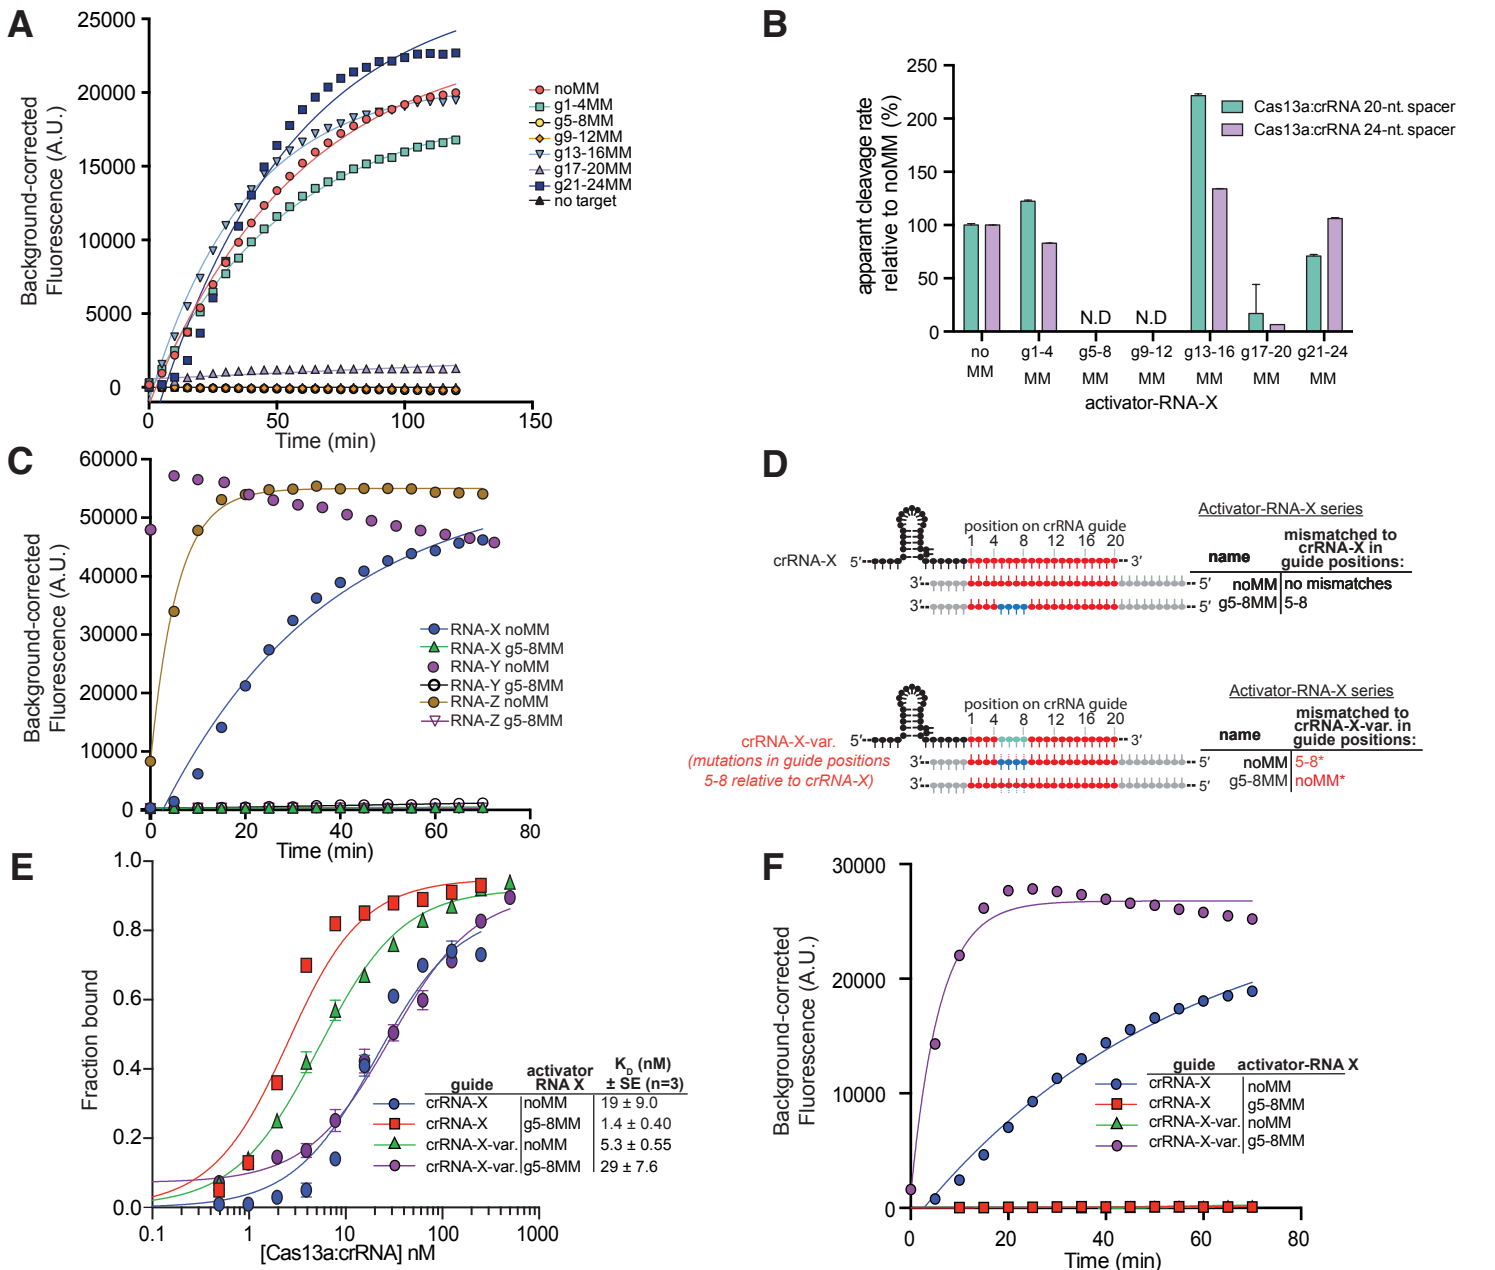

**Figure S5: Related to Figure 4. Additional HEPN-nuclease activation experiments with a 24-nt. crRNA-spacer, and additional data showing g5-8MM abolish Lbu-dCas13a HEPN-nuclease activation but not binding.** (A) representative time course of background corrected fluorescence measurements generated by Lbu- Cas13a: crRNA-X (with a 24-nt. spacer) activation by the addition of 100 pM activator RNA-X with either zero (noMM) or four consecutive mismatches across the crRNA-spacer region. Quantified data were fitted with single-exponential decays (solid line) with calculated apparent rate constants ( $k_{obs}$ ) (mean  $\pm$  s.d.,  $n = 3$ ) as follows: noMM  $0.025 \pm 0.001 \text{ min}^{-1}$ , g1-4MM  $0.021 \pm 0.001 \text{ min}^{-1}$ , g13-16MM  $0.034 \pm 0.001 \text{ min}^{-1}$ , g17-20MM  $0.002 \pm 0.010 \text{ min}^{-1}$ , g21-24MM  $0.027 \pm 0.003 \text{ min}^{-1}$  while g5-8MM and g9-12 were not fit. (B) Data from (A) normalized as a percent cleavage rate relative to a perfectly complementary X activator-RNA (noMM) with error bars representing the normalized s.d from three independent experiments. (C) representative time courses of background corrected fluorescence measurements generated by Lbu-Cas13a activation by the addition of 100 pM activator-RNAs with either zero (noMM) or four consecutive mismatches in positions 5-8 of the crRNA-spacer (g5-8MM). Three different RNA sequences (X, Y & Z) and their corresponding crRNAs were tested. Exponential fits are shown as solid lines, except no fit is shown for RNA-Y noMM, as this reaction when to completion before accurate measurements could be taken. (D) Schematic of the Lbu-Cas13a crRNA: ssRNA activator interaction highlighting the position of the mismatches between noMM and g5-8MM RNAs with standard crRNA-X and crRNA-X-variant (crRNA-X-var.; with mismatches in positions 5-8 of the crRNA). (E) Filter binding curves for the interaction between Lbu-dCas13a: crRNA (X, or X-var.) and activator-RNA-X with noMM or g5-8MM mismatches. Activator-RNAs are all labeled with a 5'-32P, and were detected using phosphor-imaging. Binding data fits (see Methods) shown as solid lines. Error-bars represent the s.d of the fraction bound from three independent experiments. Dissociation constants ( $K_D$ ) and their associated standard errors (SE) from three independent experiments are shown. (F) representative time courses of background corrected fluorescence measurements generated by crRNA-X std- or crRNA-X-var. loaded Lbu-Cas13a activated by the addition of 100 pM activator- RNA-X noMM or RNA-X g5-8MM. Exponential fits are shown as solid lines.

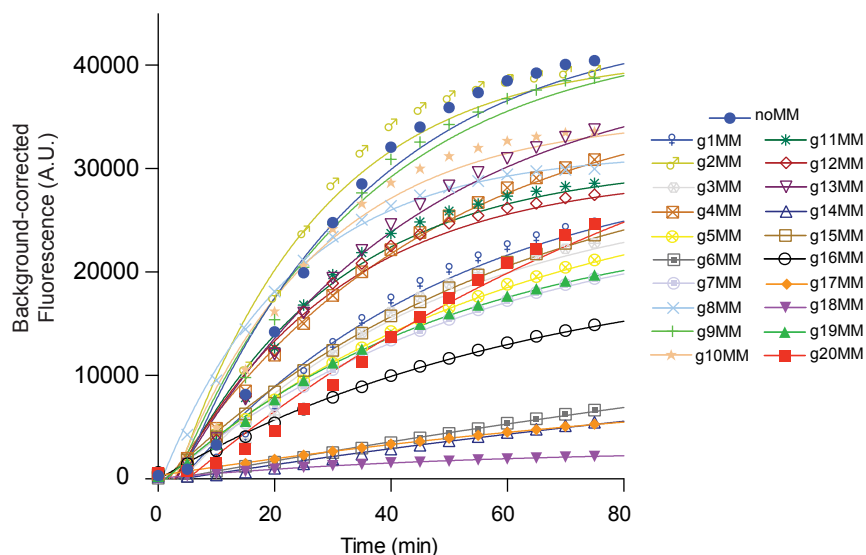

**Figure S6: Related to Figure 5. Single mismatch HEPN-nuclease activation time course data.** (A) representative time courses of background corrected fluorescence measurements generated by Lbu-Cas13a: crRNA-X activation by the addition of 100 pM activator-RNA-X with either zero or single mismatches within positions 1-20 of crRNA-spacer targeting region (where g1MM= a mismatch between crRNA and target at . Exponential fits are shown as solid lines. Quantified data were fitted with single-exponential decays (solid line) with calculated apparent rate constants ( $k_{obs}$ ) (mean  $\pm$  s.d.,  $n=3$ ) as follows: noMM  $0.031 \pm 0.003 \text{ min}^{-1}$ , g1MM  $0.022 \pm 0.002 \text{ min}^{-1}$ , g2MM  $0.044 \pm 0.008 \text{ min}^{-1}$ , g3MM  $0.018 \pm 0.001 \text{ min}^{-1}$ , g4MM  $0.027 \pm 0.002 \text{ min}^{-1}$ , g5MM  $0.023 \pm 0.001 \text{ min}^{-1}$ , g6MM  $0.0058 \pm 0.0002 \text{ min}^{-1}$ , g7MM  $0.013 \pm 0.0005 \text{ min}^{-1}$ , g8MM  $0.0124 \pm 0.0005 \text{ min}^{-1}$ , g9MM  $0.020 \pm 0.001 \text{ min}^{-1}$ , g10MM  $0.06 \pm 0.02 \text{ min}^{-1}$ , g11MM  $0.043 \pm 0.006 \text{ min}^{-1}$ , g12MM  $0.048 \pm 0.008 \text{ min}^{-1}$ , g13MM  $0.038 \pm 0.005 \text{ min}^{-1}$ , g14MM  $0.017 \pm 0.001 \text{ min}^{-1}$ , g15MM  $0.047 \pm 0.007 \text{ min}^{-1}$ , g16MM  $0.017 \pm 0.001 \text{ min}^{-1}$ , g17MM  $0.009 \pm 0.0002 \text{ min}^{-1}$ , g18MM  $0.018 \pm 0.001 \text{ min}^{-1}$ , g19MM  $0.021 \pm 0.001 \text{ min}^{-1}$ , g20MM  $0.010 \pm 0.0003 \text{ min}^{-1}$ .

Data Table S1: Related to Figures 1-2, 5b, S1-3. Illumina sequencing statistics for each HT-RBP sample

| Condition             | Replicate | Sample ID | Total reads | Unique reads | Unique counts<br>RNA-X | Unique counts<br>RNA-Y | Pairwise x | Pairwise y | Pairwise Pearson (R <sup>2</sup> ) |
|-----------------------|-----------|-----------|-------------|--------------|------------------------|------------------------|------------|------------|------------------------------------|
| 10nM Cas13a: crRNA-Y  | 1         | sample_1  | 15625349    | 11793370     | 2104587                | 9688783                | sample_1   | sample_2   | 0.997999                           |
|                       | 2         | sample_2  | 15931800    | 11991568     | 2265699                | 9725869                | sample_1   | sample_3   | 0.998073                           |
|                       | 3         | sample_3  | 15150907    | 11270000     | 1948216                | 9321784                | sample_2   | sample_3   | 0.998129                           |
| 100nM Cas13a: crRNA-Y | 1         | sample_4  | 15507952    | 11980887     | 1790488                | 10190399               | sample_4   | sample_5   | 0.864246                           |
|                       | 2         | sample_5  | 16082538    | 12226500     | 1438966                | 10787534               | sample_4   | sample_6   | 0.950326                           |
|                       | 3         | sample_6  | 21710528    | 15530314     | 2584781                | 12945533               | sample_5   | sample_6   | 0.873170                           |
| 10nM Cas13a: crRNA-X  | 1         | sample_7  | 13010814    | 9768026      | 3261464                | 6506562                | sample_7   | sample_8   | 0.941342                           |
|                       | 2         | sample_8  | 14640111    | 11228335     | 2550369                | 8677966                | sample_7   | sample_9   | 0.984130                           |
|                       | 3         | sample_9  | 15564034    | 11365145     | 3767470                | 7597675                | sample_8   | sample_9   | 0.967258                           |
| 100nM Cas13a: crRNA-X | 1         | sample_10 | 17452867    | 12623557     | 4497522                | 8126035                | sample_10  | sample_11  | 0.987434                           |
|                       | 2         | sample_11 | 18644215    | 13605710     | 4803110                | 8802600                | sample_10  | sample_12  | 0.988626                           |
|                       | 3         | sample_12 | 16870822    | 12775716     | 3728029                | 9047687                | sample_11  | sample_12  | 0.971437                           |
| Apo-Cas13a            | 1         | sample_13 | 20154071    | 14367708     | 4121534                | 10246174               | sample_13  | sample_14  | 0.929286                           |
|                       | 2         | sample_14 | 16111507    | 12379557     | 2406785                | 9972772                | sample_13  | sample_15  | 0.885397                           |
|                       | 3         | sample_15 | 25255372    | 16919256     | 3899103                | 13020153               | sample_14  | sample_15  | 0.921500                           |
| Input                 | 1         | sample_16 | 16737631    | 12842032     | 3536839                | 9305193                | sample_16  | sample_17  | 0.996884                           |
|                       | 2         | sample_17 | 21413244    | 15571405     | 4360460                | 11210945               | sample_16  | sample_18  | 0.994002                           |
|                       | 3         | sample_18 | 19043873    | 14260906     | 3985978                | 10274928               | sample_17  | sample_18  | 0.993706                           |
